# Supplementary material for: On the extraordinary pressure stability of the Thermotoga maritima arginine binding protein and its folded fragments – a high-pressure FTIR spectroscopy study
Source: Royal Society of Chemistry journal article supplement (doi:10.1039/d0cp01618g), 2020-01-01
Supplement: d0cp01618g1.pdf [file d0cp01618g1.pdf]

## Supporting Information

### Material and Methods

All the systems were recombinantly expressed using protocols previously reported.<sup>[1-5]</sup> Although no exogenous arginine was added to the samples, previous studies indicate that both the wild-type dimer and the truncated monomer ArgBP<sup>20-233</sup> retain the ligand in the binding pocket.<sup>[3,6]</sup> For H/D-exchange experiments, the lyophilized powder of the different variants of the protein were dialysed in D<sub>2</sub>O using Amicon Ultra (2 mL) centrifugation units with 10 kDa cutoff and subsequently lyophilized. 50 mM Tris buffer was chosen for the Fourier-transform infrared (FTIR) spectroscopy measurements. The pD value was adjusted to 7.5 (pH +0.4 = pD) by adding DCl or NaOD.

The measurements were performed using a MAGNA 550 (Thermo Fisher Scientific) equipped with a liquid-nitrogen cooled MCT-detector (HgCdTe). Details of the system were described elsewhere.<sup>[7]</sup> Owing to the pressure-sensitive stretching vibration of SO<sub>4</sub><sup>2-</sup> (983.5 cm<sup>-1</sup>  $\pm$  1 bar), BaSO<sub>4</sub> was used as an internal pressure standard.<sup>[8]</sup> A protein concentration of 50 mg mL<sup>-1</sup> was used for each measurement. The spectra were averaged over 128 scans in a row by using Omnic 7.2 spectral processing software. The resolution was set at 2 cm<sup>-1</sup> and the temperature (25 °C) was measured with a digital thermometer placed in the sample cell with an accuracy of  $\pm$  0.2 °C. The spectra obtained were processed and analysed with Thermo Grams 8.0 software as follows: After buffer subtraction and smoothing, the area of the amide I' band (1700-1600 cm<sup>-1</sup>) was normalized to 1. Peak numbers and peak positions for fitting of the subbands were obtained from the maxima of the Fourier self-deconvolution (FSD, Gamma factor: 13) and minima of the 2nd derivative spectra (derivative: 2<sup>nd</sup>, degree: 3, points: 11) approaches. FSD is a mathematical procedure for reducing bandwidth in order to resolve overlapping bands from each other. In order to counteract the spectral noise, the deconvolution is further multiplied by a smoothing function (smoothing: 65%).<sup>[9]</sup> Here, the amide I' band region of the different kinds of ArgBP can be decomposed into seven (for the ArgBP<sup>D1</sup> domain into six) subbands. The matching peak positions provide the position of the maxima of the subbands for the fitting process relatively precisely. In addition, the range of a subband position was limited to  $\pm$  2 cm<sup>-1</sup>. The start parameters number, position, height and half-width of the subbands were then fixed with reasonable limits.<sup>[10,11]</sup> To determine the relative changes in the population of secondary structure elements, mixed Gaussian-Lorentzian line shape functions were used in the fitting procedure, which were adapted to the normalized amide I' band.<sup>[10,12]</sup> The area of each subband corresponds to the percentage of the secondary structure it is assigned to (the total amide I' band area equals 100%).<sup>[11]</sup>

Boltzmann fits, which are based on the assumption that a two-state unfolding process of the protein takes place, to the pressure-dependent sigmoidal curve progression of the secondary structural elements were used to obtain the volume changes upon (partial) unfolding or dissociation. The pressure-induced intensity changes are given by

$$I = \frac{I_f - I_u}{1 + e^{-\frac{\Delta V_u}{RT}(p - p_u)}} + I_u \quad (1)$$

where  $I_f$  and  $I_u$  are the plateau values of the IR band intensities of the folded and unfolded/dissociated protein, respectively. Generally, by favoring states with a smaller partial

molar volume, pressure shifts an equilibrium towards the state with smaller overall volume, in accord with Le Châtelier’s principle. The effect of pressure on any chemical equilibrium or conformational transition is given by

$$\left(\frac{d\ln K}{dp}\right)_T = -\frac{\Delta V}{RT} \quad (2)$$

at constant temperature, where  $K$  is the pressure-dependent equilibrium constant and  $\Delta V$  is the associated volume change, in our case upon protein (partial) unfolding or dissociation. Hence, the  $K$  values can be expected to exponentially depend on pressure, and a transition that is accompanied by a positive  $\Delta V$  will be suppressed under pressure, and vice versa.

**Table SI 1:** Comparison of all secondary structure elements in percent of all measured ArgBP variants at 1 bar, 10 kbar and after decompression.

| ArgBP variants          | Secondary structure element      | $\tilde{\nu} / \text{cm}^{-1}$ | Secondary structure elements in % |              |               |
|-------------------------|----------------------------------|--------------------------------|-----------------------------------|--------------|---------------|
|                         |                                  |                                | at 1 bar                          | at ~ 10 kbar | decompression |
| ArgBP <sup>20_246</sup> | ■ $\beta$ -sheets or turns       | 1686                           | 1                                 | 2            | 2             |
|                         | ● $\beta$ -sheets or turns       | 1677                           | 4                                 | 4            | 4             |
|                         | ▲ $\beta$ -sheets or turns       | 1670                           | 7                                 | 5            | 5             |
|                         | ▼ $\alpha$ -helices              | 1654                           | 35                                | 29           | 31            |
|                         | ◀ intramolecular $\beta$ -sheets | 1638                           | 30                                | 39           | 35            |
|                         | ◆ random coils                   | 1643                           | 17                                | 14           | 16            |
|                         | ▶ side chains                    | 1615                           | 6                                 | 7            | 7             |
| ArgBP <sup>20_233</sup> | ■ $\beta$ -sheets or turns       | 1686                           | 1                                 | 1            | 1             |
|                         | ● $\beta$ -sheets or turns       | 1678                           | 4                                 | 5            | 4             |
|                         | ▲ $\beta$ -sheets or turns       | 1669                           | 7                                 | 7            | 5             |
|                         | ▼ $\alpha$ -helices              | 1654                           | 33                                | 26           | 31            |
|                         | ◀ intramolecular $\beta$ -sheets | 1638                           | 31                                | 39           | 36            |
|                         | ◆ random coils                   | 1643                           | 17                                | 14           | 16            |
|                         | ▶ side chains                    | 1615                           | 6                                 | 8            | 6             |
| ArgBP <sup>D1</sup>     | ■ $\beta$ -sheets or turns       | 1680                           | 6                                 | 5            | 7             |
|                         | ● $\beta$ -sheets or turns       | 1668                           | 9                                 | 9            | 8             |
|                         | ▼ $\alpha$ -helices              | 1654                           | 29                                | 25           | 31            |
|                         | ◀ intramolecular $\beta$ -sheets | 1638                           | 30                                | 34           | 27            |
|                         | ◆ random coils                   | 1643                           | 22                                | 20           | 20            |
|                         | ▶ side chains                    | 1615                           | 4                                 | 7            | 5             |
|                         | ■ $\beta$ -sheets or turns       | 1684                           | 4                                 | 5            | 4             |
| ArgBP <sup>D2</sup>     | ● $\beta$ -sheets or turns       | 1676                           | 2                                 | 2            | 2             |
|                         | ▲ $\beta$ -sheets or turns       | 1661                           | 12                                | 10           | 12            |
|                         | ▼ $\alpha$ -helices              | 1652                           | 26                                | 22           | 26            |
|                         | ◀ intramolecular $\beta$ -sheets | 1637                           | 37                                | 42           | 37            |
|                         | ◆ random coils                   | 1643                           | 15                                | 13           | 15            |
|                         | ▶ side chains                    | 1615                           | 4                                 | 5            | 4             |

**Table SI 2:** Secondary structure content of the ArgBP variants as obtained from the PDB structures.

| Protein                 | Protein Data Bank Code | $\alpha$ -helix (%) | $\beta$ -sheet (%) |
|-------------------------|------------------------|---------------------|--------------------|
| ArgBP <sup>20-246</sup> | 4PSH                   | 38                  | 28                 |
| ArgBP <sup>20-233</sup> | 6GGV                   | 28                  | 23                 |
| ArgBP <sup>D1</sup>     | 6GPC                   | 35                  | 21                 |
| ArgBP <sup>D2</sup>     | 6GPM                   | 29                  | 26                 |

**ArgBP<sup>20\_246</sup>**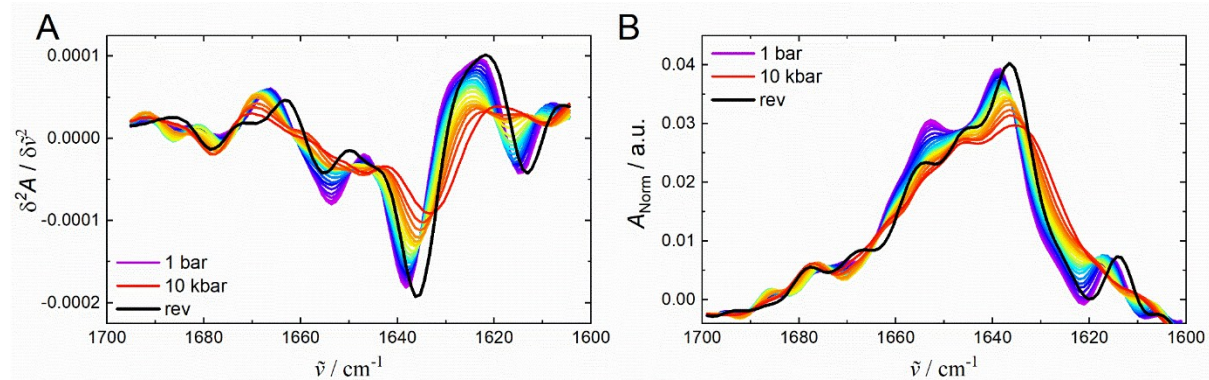**ArgBP<sup>20\_233</sup>**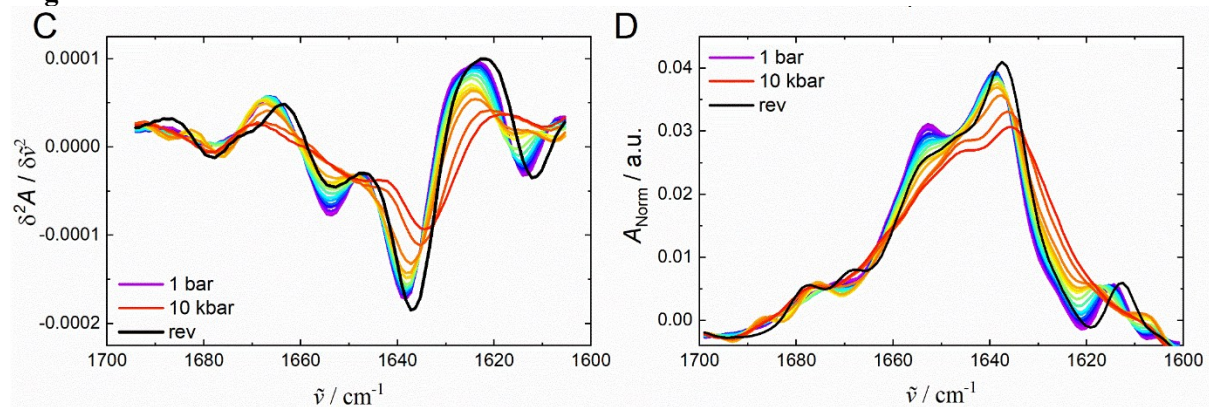**ArgBP<sup>D1</sup>**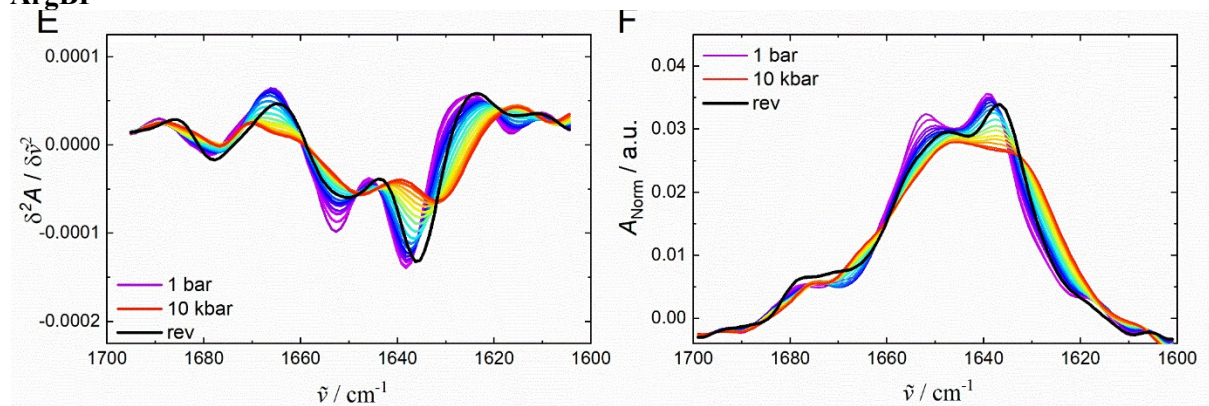**ArgBP<sup>D2</sup>**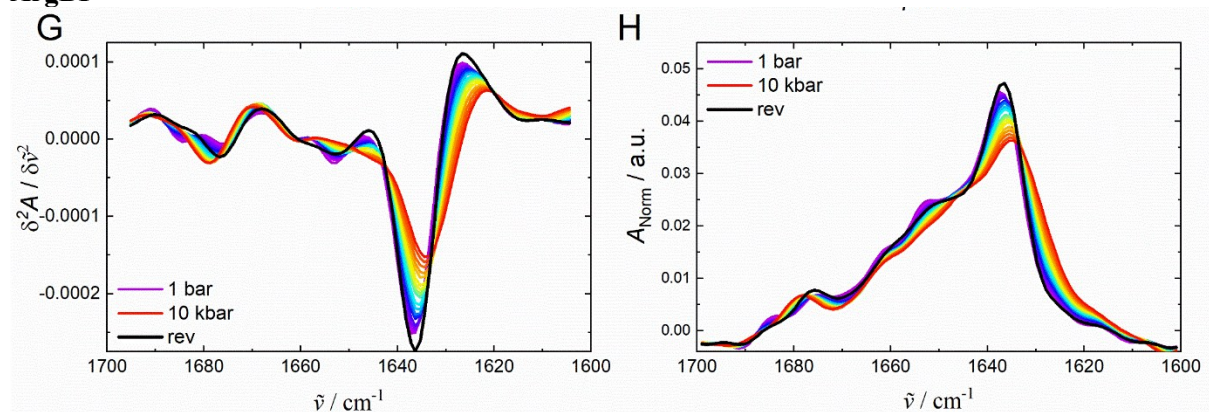

**Figure SI 1:** Corresponding deconvoluted amide I' band (B, D, F, H) and 2<sup>nd</sup> derivatives (A, C, E, G) of all measured ArgBP variants at 25 °C.

**Table SI 3:** Unfolding temperatures (no. 75) and pressures (no. 36) of proteins with conditions as far as given in the literature by using different kinds of methods. Hyper-/thermophilic proteins are marked in red, whereas mesophilic proteins are marked in black.

| Protein                                                                              | $T_u$ / °C         | Ref. | Protein                                                                       | $p_{u/d}$ / bar       | Ref. |
|--------------------------------------------------------------------------------------|--------------------|------|-------------------------------------------------------------------------------|-----------------------|------|
| 1. Tubulin ( <i>porcine brain</i> )<br>pH = 6.8                                      | 53 (D)<br>62       | [13] | 1. Tubulin ( <i>porcine brain</i> )<br>pH = 6.8                               | 1300 (D)<br>(25 °C)   | [13] |
| 2. $\alpha$ -Chymotrypsin ( <i>bovine pancreas</i> )<br>pH = 7.0                     | 41                 | [14] | 2. $\alpha$ -Chymotrypsin ( <i>bovine pancreas</i> )<br>pH = 7.0              | 4900<br>(21 °C)       | [14] |
| 3. Cytochrome C ( <i>horse</i> )<br>pH = 7.0                                         | 60                 | [15] | 3. Cytochrome C ( <i>horse</i> )<br>pH = 7.0                                  | 9000<br>(20 °C)       | [15] |
| 4. G-Aktin ( <i>rabbit skeletal muscle</i> )<br>pH = 7.8                             | 56                 | [16] | 4. G-Aktin ( <i>rabbit skeletal muscle</i> )<br>pH = 7.8                      | 2000<br>(20 °C)       | [16] |
| 5. Ubiquitin<br>pD = 7.0                                                             | 82                 | [17] | 5. Ubiquitin<br>pD = 7.0                                                      | 5200<br>(20 °C)       | [17] |
| 6. Rs GFP ( <i>Aequorea victoria</i> )<br>pD = 5.5                                   | 78                 | [18] | 6. Rs GFP ( <i>Aequorea victoria</i> )<br>pD = 5.5                            | 8600<br>(25 °C)       | [18] |
| 7. Chymotrypsinogen<br>pH = 2.0                                                      | 42                 | [19] | 7. Chymotrypsinogen<br>pH = 2.0                                               | 3500<br>(20 °C)       | [19] |
| 8. Ribonuclease A ( <i>bovine pancreas</i> )<br>pD = 7.0                             | 65                 | [20] | 8. Ribonuclease A ( <i>bovine pancreas</i> )<br>pD = 7.0                      | 7500<br>(30 °C)       | [20] |
| 9. Lipoxygenase ( <i>soaked soybeans</i> )<br>pH = 7.8                               | 68                 | [21] | 9. Lipoxygenase ( <i>soaked soybeans</i> )<br>pH = 7.8                        | 6000                  | [21] |
| 10. $\beta$ -Lactoglobulin A ( <i>bovine</i> )<br>pH=7.0                             | 60                 | [22] | 10. $\beta$ -Lactoglobulin A ( <i>bovine</i> )<br>pH = 7.0                    | 1500 (D)<br>(20° C)   | [22] |
| 11. Metmyoglobin ( <i>Sperm whale</i> )<br>pH = 9.0                                  | 78                 | [23] | 11. Metmyoglobin ( <i>Sperm whale</i> )<br>pH = 9.0                           | 6000<br>(20° C)       | [23] |
| 12. Staphylococcal nuclease<br>( <i>Staphylococcus aureus</i> )<br>pD = 5.5          | 48                 | [24] | 12. Staphylococcal nuclease<br>( <i>Staphylococcus aureus</i> )<br>pD = 5.5   | 2100<br>(25 °C)       | [24] |
| 13. Lysozyme<br>pD = 7.4                                                             | 77                 | [25] | 13. Lysozyme<br>pD = 7.4                                                      | 6000<br>(25° C)       | [25] |
| 14. Titin I27<br>pD = 7.0                                                            | 65                 | [26] | 14. Titin I27<br>pD = 7.0                                                     | 11000<br>(30°C)       | [26] |
| 15. Fluorescein binding Lipocalin FluA                                               | 47                 | [27] | 15. Fluorescein binding Lipocalin FluA                                        | 1700<br>(25 °C)       | [27] |
| 16. Equine serum albumin<br>pD = 4.4                                                 | 57                 | [28] | 16. Equine serum albumin<br>pD = 4.4                                          | 4000<br>(25 °C)       | [28] |
| 17. Arc repressor<br>pH = 7.5                                                        | 68                 | [29] | 17. Arc repressor<br>pH = 7.5                                                 | 1000 (D)              | [30] |
| 18. Ovalbumin<br>pH = 7.0                                                            | 77                 | [31] | 18. Lactatdehydrogenase<br>( <i>Bacillus stearothermophilus</i> )<br>pH = 7.6 | 1500 (T)<br>(20 °C)   | [32] |
| 19. Bovine serum albumin<br>pH = 7.0                                                 | 65                 | [31] | 19. Yeast Hexokinase<br>pH = 7.5                                              | 800 (D)<br>(30 °C)    | [33] |
| 20. Maltodextrin Glucosidase<br>pH = 7.4                                             | 52                 | [34] | 20. Yeast Glyceraldehyde-3-phosphate<br>dehydrogenase<br>pH = 7.5             | 990 (T)               | [35] |
| 21. Baker's Yeast enolase<br>pH = 7.2                                                | 58                 | [36] | 21. Yeast enolase<br>pH = 7.1                                                 | < 2400 (D)            | [37] |
| 22. Yeast 3-Phosphoglycerate kinase<br>pH = 7.0                                      | 54                 | [38] | 22. Phosphofructokinase<br>( <i>Escherichia coli</i> )<br>pH = 8.2            | < 2000 (D)<br>(25 °C) | [39] |
| 23. GroEL<br>( <i>Escherichia coli</i> )<br>pH = 7.6                                 | 70                 | [40] | 23. GroEL<br>( <i>Escherichia coli</i> )<br>pH = 7.6                          | ~ 2000 (O)<br>(20 °C) | [41] |
| 24. GroES<br>( <i>Escherichia coli</i> )<br>pH = 7.6                                 | 76                 | [40] | 24. GroES<br>( <i>Escherichia coli</i> )<br>pH = 7.6                          | 2500 (O)<br>(20 °C)   | [41] |
| 25. Papain<br>( <i>latex of the papaya fruit</i> )<br>pH = 5.6                       | 83                 | [42] | 25. Alkaline phosphatase<br>( <i>Escherichia coli</i> )                       | 8200                  | [8]  |
| 26. Immunoglobulin (monoclonal mouse<br>anti-rat antibody of isotype 2b)<br>pH = 8.1 | 71 (Fc)-<br>domain | [43] | 26. Pyruvatkinase<br>( <i>Rabbit muscle</i> )<br>pH = 7.5                     | < 3500 (T)<br>(25 °C) | [44] |

|                                                                              |      |      |                                                                                                                  |                                      |             |
|------------------------------------------------------------------------------|------|------|------------------------------------------------------------------------------------------------------------------|--------------------------------------|-------------|
| 27. Carbonic anhydrase, isozyme I, human erythrocytes<br>pH = 6.1            | 59   | [45] | 27. Lactose repressor protein ( <i>Escherichia coli</i> )<br>pH = 7.5                                            | ~ 1400 (T)                           | [46]        |
| 28. Bovine pancreatic trypsin inhibitor<br>pH = 7.0                          | 100  | [47] | 28. Bovine pancreatic trypsin inhibitor<br>pD = 7.0                                                              | 5500 (25°C)                          | [48]        |
| 29. Adenylate kinase ( <i>Escherichia coli</i> )<br>pH = 7.0                 | 52   | [49] | 29. Insulin<br>pH = 2.0                                                                                          | No unfolding event < 13 kbar         | [50]        |
| 30. DNA Polymerase ( <i>Thermus aquaticus</i> )<br>pH = 9.5                  | 97.6 | [51] | 30. N-Ras<br>pD = 7.4                                                                                            | No unfolding event < 10 kbar (25 °C) | [52]        |
| 31. $\alpha$ -Amylase ( <i>Bacillus sp.</i> )<br>pH = 5.9                    | 61   | [53] | 31. Cold shock protein A ( <i>Escherichia coli</i> )                                                             | 1500                                 | [54]        |
| 32. Horse radish peroxidase<br>pH = 7.0                                      | 74   | [55] | 32. Hemoglobin ( <i>Glossoscolex paulistus</i> )<br>pH = 7.5                                                     | 1700 (D) (20 °C)                     | [56]        |
| 33. F-Actin<br>pD = 7.8                                                      | 63.1 | [7]  | 33. F-Actin<br>pD = 7.8                                                                                          | 3500 (O) (20 °C)                     | [7]         |
| 34. Microtubuli ( <i>calf brain</i> )<br>pD = 6.8                            | 76.3 | [7]  | 34. HIV-1 protease<br>pH = 8.0                                                                                   | 2600                                 | [57]        |
| 35. Hsp90 ( <i>porcine brain</i> )<br>pH = 7.0                               | 62.8 | [58] | 35. Urate oxidase ( <i>Aspergillus flavus</i> )<br>pH = 8.0                                                      | 1750 (T) (25 °C)                     | [59]        |
| 36. Lipase ( <i>Pseudomonas cepacia</i> )<br>pH = 7.0                        | 75.2 | [60] | 36. Leucine.rich repeat domain of Anp32 tumor suppressor protein                                                 | 1300 (20 °C)                         | [61]        |
| 37. Rubisco ( <i>Lucerne</i> )<br>pH = 7.5                                   | 67.2 | [62] | <b>Protein</b>                                                                                                   | <b><math>T_u</math> / °C</b>         | <b>Ref.</b> |
| 38. Maltose binding protein ( <i>Escherichia coli</i> )<br>pH = 7.4          | 63   | [63] | 56. Small cold shock protein ( <i>Thermotoga maritima</i> )<br>pH = 6.5                                          | 88                                   | [64]        |
| 39. Oxy-Hemoglobin ( <i>Glossoscolex paulistus</i> )<br>pH = 7.0             | 60.2 | [65] | 57. DNA ligase ( <i>Thermus scoloductus</i> )<br>pH = 7.0                                                        | 95.3                                 | [66]        |
| 40. Trisephosphate isomerase ( <i>Saccharomyces cerevisiae</i> )<br>pH = 8.5 | 59.1 | [67] | 58. Triosephosphate Isomerase ( <i>Thermoplasma acidophilum</i> )<br>pH = 7.5                                    | 74                                   | [68]        |
| 41. Formate-Dehydrogenase ( <i>Candida boidinii</i> )<br>pH = 7.5            | 57   | [69] | 59. Triosephosphate Isomerase ( <i>Thermotoga maritima</i> )<br>pH = 7.5                                         | 102                                  | [68]        |
| 42. Luciferase ( <i>Firefly</i> )<br>pH=7.8                                  | 42   | [70] | 60. Cytochrome c ( <i>Hydrogenophilus thermoluteolus</i> )<br>pH = 7.5                                           | 88.1                                 | [71]        |
| 43. Leucoagglutinin ( <i>Phaseolus vulgaris</i> )<br>pH = 3.0                | 86   | [72] | 61. Farnesyl di-phosphate /geranylgeranyl diphosphate synthase ( <i>Thermococcus kodakaraensis</i> )<br>pH = 8.0 | 91                                   | [73]        |
| 44. Dihydrofolate reductase ( <i>Escherichia coli</i> )<br>pH = 7.0          | 46   | [74] | 62. Pyrrolidone carboxyl peptidase ( <i>Pyrococcus furiosus</i> )<br>pH = 9.5                                    | 115.5                                | [75]        |
| 45. Leucine-isoleucine-valine binding protein<br>pH = 7.0                    | 67   | [76] | 63. Glutamate Dehydrogenase ( <i>Pyrococcus furiosus</i> )<br>pH = 8.0                                           | 113                                  | [77]        |
| 46. Rhodopsin<br>pH = 6.9                                                    | 63.8 | [78] | 64. Methylguanine-DNA-methyltransferase ( <i>Thermococcus kodakaraensis</i> )<br>pH = 8.0                        | 98.6                                 | [79]        |
| 47. Bacteriorhodopsin<br>pH = 7.4                                            | 67.5 | [80] | 65. Methylguanine-DNA-methyltransferase ( <i>Escherichia coli</i> )<br>pH = 8.0                                  | 43.8                                 | [79]        |
| 48. $\alpha$ -Crystallin ( <i>bovine lens</i> )<br>pH = 7.2                  | 61   | [81] | 66. Alcohol dehydrogenase ( <i>Thermoanaerobacter brockii</i> )<br>pH = 7.5                                      | 87                                   | [82]        |
| 49. DNA ligase ( <i>Escherichia coli</i> )<br>pH = 7.0                       | 53.9 | [66] | 67. Alcohol dehydrogenase (yeast)<br>pH = 7.5                                                                    | 60                                   | [82]        |

|                                                                                    |    |      |                                                                          |                       |      |
|------------------------------------------------------------------------------------|----|------|--------------------------------------------------------------------------|-----------------------|------|
| 50. Tetracycline repressor<br>pH = 8.0                                             | 59 | [83] | 68. Plastocyanin<br>( <i>Phormidium laminosum</i> )<br>pH = 5.5          | Ox: 83,1<br>Red: 76,4 | [84] |
| 51. 3-isopropylmalate dehydrogenase<br>( <i>Escherichia coli</i> )<br>pH = 7.0     | 63 | [85] | 70. L-arabinose isomerases<br>( <i>Bacillus halodurans</i> )<br>pH = 8.0 | 71                    | [86] |
| 52. 3-isopropylmalate dehydrogenase<br>( <i>Thermus thermophilus</i> )<br>pH = 7.0 | 83 | [85] | 71. L-arabinose isomerases<br>( <i>Thermotoga maritima</i> )<br>pH = 7.0 | 91                    | [86] |
| 53. Aspartate aminotransferase<br>( <i>Sulfolobus solfataricus</i> )<br>pH = 7.5   | 85 | [87] | 72. Xylanase<br>( <i>Clostridium thermocellum</i> )<br>pH = 7.5          | 81,4                  | [88] |
| 54. RNase H<br>( <i>Thermus thermophilus</i> )<br>pH = 5.5                         | 82 | [89] | 73. Ferredoxin<br>( <i>Thermus thermophiles</i> )<br>pH = 7.2            | 114                   | [90] |
| 55. Phosphoglycerate kinase<br>( <i>Thermus thermophilus</i> )<br>pH = 7.5         | 91 | [91] | 74. Streptavidin<br>pH = 7.4                                             | 75.5                  | [92] |
| 55. $\alpha$ -Amylase<br>(thermophilic org.)                                       | 86 | [93] | 75. Avidin<br>pH = 7.4                                                   | 83                    | [92] |

**Table SI 4:** Unfolding temperatures and pressures used to generate Figure 4B inset.

| $T_u / ^\circ\text{C}$ | $p_{w/d} / \text{bar}$ | Name                                                              |
|------------------------|------------------------|-------------------------------------------------------------------|
| 41                     | 4900                   | $\alpha$ -Chymotrypsin ( <i>bovine pancreas</i> ) pH = 7.0        |
| 42                     | 3500                   | Chymotrypsinogen pH = 2.0                                         |
| 47                     | 1700                   | Fluorescein binding Lipocalin FluA                                |
| 48                     | 2100                   | Staphylococcal nuclease ( <i>Staphylococcus aureus</i> ) pD = 5.5 |
| 53                     | 1300                   | Tubulin ( <i>porcine brain</i> ) pH = 6.8                         |
| 56                     | 2000                   | G-Aktin ( <i>rabbit skeletal muscle</i> ) pH = 7.8                |
| 57                     | 4000                   | Equine serum albumin pD = 4.4                                     |
| 60                     | 1500                   | $\beta$ -Lactoglobulin A ( <i>bovine</i> ) pH=7.0                 |
| 60                     | 9000                   | Cytochrome C ( <i>horse</i> ) pH = 7.0                            |
| 63,1                   | 3500                   | F-Actin pD = 7.8                                                  |
| 65                     | 7500                   | Ribonuclease A ( <i>bovine pancreas</i> ) pD = 7.0                |
| 65                     | 11000                  | Titin I27 pD = 7.0                                                |
| 68                     | 1000                   | Arc repressor pH = 7.5                                            |
| 68                     | 6000                   | Lipoxygenase ( <i>soaked soybeans</i> ) pH = 7.8                  |
| 76                     | 2500                   | GroES ( <i>Escherichia coli</i> ) pH = 7.6                        |
| 77                     | 6000                   | Lysozyme pD = 7.4                                                 |
| 78                     | 6000                   | Metmyoglobin ( <i>Sperm whale</i> ) pH = 9.0                      |
| 78                     | 8600                   | Rs GFP ( <i>Aequorea victoria</i> ) pD = 5.5                      |
| 82                     | 5200                   | Ubiquitin pD = 7.0                                                |
| 100                    | 5500                   | Bovine pancreatic trypsin inhibitor pH = 7.0                      |



## References

- [1] A. Ruggiero, J. D. Dattelbaum, A. Pennacchio, L. Iozzino, M. Staiano, M. S. Luchansky, B. S. Der, R. Berisio, S. Dauria, L. Vitagliano, *Acta Cryst. Sect. F Struc. Biol. Cryst. Commun.* **2011**, *67*, 1462–1465.
- [2] N. Balasco, G. Smaldone, M. Vigorita, P. Del Vecchio, G. Graziano, A. Ruggiero, L. Vitagliano, *Sci. Rep.* **2019**, *9*, 6617.
- [3] G. Smaldone, R. Berisio, N. Balasco, S. D’Auria, L. Vitagliano, A. Ruggiero, *Biochim. Biophys. Acta* **2018**, *1866*, 952–962.
- [4] G. Smaldone, N. Balasco, M. Vigorita, A. Ruggiero, S. Cozzolino, R. Berisio, P. del Vecchio, G. Graziano, L. Vitagliano, *Int. J. Biol. Macromol.* **2018**, *119*, 758–769.
- [5] A. Ruggiero, J. D. Dattelbaum, M. Staiano, R. Berisio, S. D’Auria, L. Vitagliano, *PLoS One* **2014**, *9*, 1–11.
- [6] M. S. Luchansky, B. S. Der, S. D’Auria, G. Pocsfalvi, L. Iozzino, D. Marasco, J. D. Dattelbaum, *Mol. Biosyst.* **2009**, *6*, 142–151.
- [7] P. H. Schummel, M. W. Jaworek, C. Rosin, J. Högg, R. Winter, *Phys. Chem. Chem. Phys.* **2018**, *20*, 28400–28411.
- [8] P. T. T. Wong, D. W. Armstrong, *Biochim. Biophys. Acta* **1992**, *1159*, 237–242.
- [9] P. B. Tooke, *Trends Anal. Chem.* **1988**, *7*, 130–136.
- [10] D. M. Byler, H. Susi, *Biopolymers* **1986**, *25*, 469–487.
- [11] S. J. Prestrelski, D. M. Byler, M. N. Liebman, *Biochemistry* **1991**, *30*, 133–143.
- [12] G. Panick, R. Winter, *Biochemistry* **2000**, *39*, 1862–1869.
- [13] P. H. Schummel, C. Anders, M. Jaworek, R. Winter, *ChemPhysChem* **2019**, *20*, 1–13.
- [14] Z. Sun, R. Winter, *Temperature- and Pressure-Induced Unfolding of  $\alpha$ -Chymotrypsin*, Berlin, **2002**.
- [15] H. Lesch, H. Stadibauer, J. Friedrich, J. M. Vanderkooi, *Biophys. J.* **2002**, *82*, 1644–1653.
- [16] C. Rosin, M. Erlkamp, J. von der Ecken, S. Raunser, R. Winter, *Biophys. J.* **2014**, *107*, 2982–2992.
- [17] H. Herberhold, R. Winter, *Biochemistry* **2002**, *41*, 2396–2401.
- [18] H. Herberhold, S. Marchal, R. Lange, C. H. Scheyhing, R. F. Vogel, R. Winter, *J. Mol. Biol.* **2003**, *330*, 1153–1164.
- [19] S. A. Hawley, *Biochemistry* **1971**, *10*, 2436–2442.
- [20] N. Takeda, M. Kato, Y. Taniguchi, *Biochemistry* **1995**, *34*, 5980–5987.
- [21] O. Heinisch, E. Kowalski, K. Goossens, J. Frank, K. Heremans, H. Ludwig, B. Tauscher, *Z. Leb. Unters. -Forsch.* **1995**, *201*, 562–565.
- [22] G. Panick, R. Malessa, R. Winter, *Biochemistry* **1999**, *38*, 6512–6519.
- [23] A. Zipp, W. Kauzmann, *Biochemistry* **1973**, *12*, 4217–4228.
- [24] G. Panick, G. J. A. Vidugiris, R. Malessa, G. Rapp, R. Winter, C. A. Royer, *Biochemistry* **1999**,

- 38, 4157–4164.
- [25] S. R. Al-Ayoubi, P. H. Schummel, M. Golub, J. Peters, R. Winter, *Phys. Chem. Chem. Phys.* **2017**, *19*, 14230–14237.
- [26] J. Somkuti, Z. Mártonfalvi, M. S. Z. Kellermayer, L. Smeller, *Biochim. Biophys. Acta* **2013**, *1834*, 112–118.
- [27] J. Wiedersich, S. Köhler, A. Skerra, J. Friedrich, *PNAS* **2008**, *105*, 5756–5761.
- [28] Y. Taniguchi, A. Okuno, M. Kato, *J. Phys.* **2010**, *215*, 1–4.
- [29] C. R. Robinson, D. Rentzeperis, J. L. Silva, R. T. Sauer, *J. Mol. Biol.* **1997**, *273*, 692–700.
- [30] J. L. Silva, C. F. Silveira, A. Correia, L. Pontes, *J. Mol. Biol.* **1992**, *223*, 545–555.
- [31] I. Hayakawa, Y. Y. Linko, P. Linko, *Leb. u.-Technol.* **1996**, *29*, 756–762.
- [32] K. Müller, T. Seifert, R. Jaenicke, *Eur. Biophys. J.* **1984**, *11*, 87–94.
- [33] K. Ruan, G. Weber, *Biochemistry* **1988**, *27*, 3295–3301.
- [34] M. Goyal, T. K. Chaudhuri, K. Kuwajima, *PLoS One* **2014**, *9*, 1–23.
- [35] K. Ruan, G. Weber, *Biochemistry* **1989**, *28*, 2144–2153.
- [36] P. Huang, A. Dong, *Spectroscopy* **2003**, *17*, 453–467.
- [37] M. J. Kornblatt, R. Lange, C. Balny, *Eur. J. Biochem.* **2004**, *271*, 3897–3904.
- [38] G. J. Davies, S. J. Gamblin, J. A. Littlechild, H. C. Watson, *Proteins* **1993**, *15*, 283–289.
- [39] D. Deville-Bonne, A. J. Elese, *Eur. J. Biochem.* **1991**, *200*, 747–750.
- [40] A. K. Surin, N. V. Kotova, I. A. Kashparov, V. V. Marchenkov, S. Y. Marchenkova, G. V. Semisotnov, *FEBS Lett.* **1997**, *405*, 260–262.
- [41] M. Panda, J. Ybarra, P. M. Horowitz, *J. Biol. Chem.* **2001**, *276*, 6253–6259.
- [42] H. A. Sathish, P. R. Kumar, V. Prakash, *Int. J. Biol. Macromol.* **2007**, *41*, 383–390.
- [43] A. W. P. Vermeer, W. Norde, *Biophys. J.* **2000**, *78*, 394–404.
- [44] F. G. De Felice, V. C. Soares, S. T. Ferreira, *Eur. J. Biochem.* **1999**, *266*, 163–169.
- [45] D. Matulis, J. K. Kranz, F. R. Salemme, M. J. Todd, *Biochemistry* **2005**, *44*, 5258–5266.
- [46] C. A. Royer, G. Weber, T. J. Daly, K. S. Matthews, *Biochemistry* **1986**, *25*, 8308–8315.
- [47] G. I. Makhatadze, K. -S. -S. Kim, C. Woodward, P. L. Privalov, *Protein Sci.* **1993**, *2*, 2028–2036.
- [48] N. Takeda, K. Nakano, M. Kato, Y. Taniguchi, *Biospectroscopy* **1998**, *4*, 209–216.
- [49] P. Christova, A.-M. Gilles, C. Craescu, *Comptes Rendus l'Academie Bulg. des Sci.* **2000**, *53*, 77–80.
- [50] C. Dirix, F. Meersman, K. Heremans, *High Press. Res.* **2010**, *23*, 63–66.
- [51] I. Karantzeni, C. Ruiz, C. C. Liu, V. J. Licata, *Biophys. J.* **2003**, *374*, 785–792.
- [52] S. Kapoor, G. Triola, I. R. Vetter, M. Erlkamp, H. Waldmann, R. Winter, *PNAS* **2012**, *109*, 460–465.
- [53] J. K. Yadav, V. Prakash, *J. Biosci.* **2009**, *34*, 377–387.
- [54] S. Schneider, H. Paulsen, K. C. Reiter, E. Hinze, C. Schiene-Fischer, C. G. Hübner, *J. Chem. Phys.* **2018**, *148*, 123336-1–13.
- [55] K. Chattopadhyay, S. Mazumdar, *Biochemistry* **2000**, *39*, 263–270.
- [56] J. L. Silva, M. Villas-Boas, C. F. S. Bonafe, N. C. Meirelles, *J. Biol. Chem.* **1989**, *264*, 15863–

15868.

- [57] M. Ingr, R. Lange, V. Halabalová, A. Yehya, J. Hrnčířík, D. Chevalier-Lucia, L. Palmade, C. Blayo, J. Konvalinka, E. Dumay, *PLoS One* **2015**, *10*, 1–27.
- [58] C. Garnier, I. Protasevich, R. Gilli, P. Tsvetkov, V. Lobachov, V. Peyrot, C. Briand, A. Makarov, *Biochem. Bioph. Res. Commun.* **1998**, *249*, 197–201.
- [59] E. Girard, S. Marchal, J. Perez, S. Finet, R. Kahn, R. Fourme, G. Marassio, A. C. Dhaussy, T. Prangé, M. Giffard, et al., *Biophys. J.* **2010**, *98*, 2356–2364.
- [60] A. Tanaka, *J. Biochem.* **1998**, *123*, 289–293.
- [61] J. Roche, C. A. Royer, *J. R. Soc. Interface* **2018**, *15*, DOI 10.1098/rsif.2018.0244.
- [62] V. Béghin, H. Bizot, M. Audebrand, J. Lefebvre, D. G. Libouga, R. Douillard, *Int. J. Biol. Macromol.* **1993**, *15*, 195–200.
- [63] C. Ganesh, A. N. Shah, C. P. Swaminathan, A. Surolia, R. Varadarajan, *Biochemistry* **1997**, *36*, 5020–5028.
- [64] B. Schuler, W. Kremer, H. R. Kalbitzer, R. Jaenicke, *Biochemistry* **2002**, *41*, 11670–11680.
- [65] J. W. P. Carvalho, F. A. O. Carvalho, P. S. Santiago, M. Tabak, *Int. J. Biol. Macromol.* **2013**, *54*, 109–118.
- [66] D. Georgette, B. Damien, V. Blaise, E. Depiereux, V. N. Uversky, C. Gerday, G. Feller, *J. Biol. Chem.* **2003**, *278*, 37015–37023.
- [67] C. G. Benítez-Cardoza, A. Rojo-Domínguez, A. Hernández-Arana, *Biochemistry* **2001**, *40*, 9049–9058.
- [68] S. H. Park, H. S. Kim, M. S. Park, S. Moon, M. K. Song, H. S. Park, H. Hahn, S. J. Kim, E. Bae, H. J. Kim, et al., *PLoS One* **2015**, *10*, 1–13.
- [69] H. Slusarczyk, S. Felber, M. R. Kula, M. Pohl, *Eur. J. Biochem.* **2000**, *267*, 1280–1289.
- [70] M. Naderi, A. A. Moosavi-Movahedi, S. Hosseinkhani, M. Nazari, M. Bohlooli, J. Hong, H. Hadi-Alijanvand, N. Sheibani, *Protein Pept Lett.* **2015**, *22*, 23–30.
- [71] S. Fujii, M. Masanari, H. Inoue, M. Yamanaka, S. Wakai, H. Nishihara, Y. Sambongi, *Biosci. Biotech. Biochem.* **2013**, *77*, 1677–1681.
- [72] S. Biswas, A. M. Kayastha, *J. Biochem. Mol. Biol.* **2002**, *35*, 472–475.
- [73] S. Fujiwara, A. Yamanaka, K. Hirooka, A. Kobayashi, T. Imanaka, E. I. Fukusaki, *Biochem. Bioph. Res. Commun.* **2004**, *325*, 1066–1074.
- [74] H. Uedaira, S. -I. Kidokoro, M. Iwakura, S. Honda, S. Ohashi, *Ann. NY Acad. Sci.* **1990**, *613*, 352–357.
- [75] K. Ogasahara, N. N. Khechinashvili, M. Nakamura, T. Yoshimoto, K. Yutani, *Eur. J. Biochem.* **2001**, *268*, 3233–3242.
- [76] R. S. Prajapati, M. Das, S. Sreeramulu, M. Sirajuddin, V. Sankaranarayanan, S. Krishnamurthy, R. Ranjani, C. Ramakrishnan, R. Varadarajan, *Proteins* **2007**, *66*, 480–491.
- [77] H. Klump, J. Di Ruggiero, M. Kessel, J. B. Park, M. W. W. Adams, F. T. Robb, *J. Biol. Chem.* **1992**, *267*, 22681–22685.
- [78] A. Reyes-Alcaraz, M. Martínez-Archundia, E. Ramon, P. Garriga, *Biophys. J.* **2011**, *101*, 2798–

2806.

- [79] K. Shiraki, S. Nishikori, S. Fujiwara, H. Hashimoto, Y. Kai, M. Takagi, T. Imanaka, *Eur. J. Biochem.* **2001**, *268*, 4144–4150.
- [80] C. G. Brouillette, R. B. McMichens, L. J. Stern, H. G. Khorana, *Proteins* **1989**, *5*, 38–46.
- [81] T. Rasmussen, M. van de Weert, W. Jiskoot, M. R. Kasimova, *Proteins* **2011**, *79*, 1747–1758.
- [82] A. Barzegar, A. A. Moosavi-Movahedi, J. Z. Pedersen, M. Miroliaei, *Enzym. Microb. Technol.* **2009**, *45*, 73–79.
- [83] S. Kędracka-Krok, Z. Wasylewski, *Eur. J. Biochem.* **2003**, *270*, 4564–4573.
- [84] M. J. Feio, J. A. Navarro, M. S. Teixeira, D. Harrison, B. G. Karlsson, M. A. De La Rosa, *Biochemistry* **2004**, *43*, 14784–14791.
- [85] C. Motono, T. Oshima, A. Yamagishi, *Protein Eng.* **2001**, *14*, 961–966.
- [86] D. W. Lee, Y. H. Hong, E. A. Choe, S. J. Lee, S. B. Kim, H. S. Lee, J. W. Oh, H. H. Shin, Y. R. Pyun, *FEBS Lett.* **2005**, *579*, 1261–1266.
- [87] M. I. Arnone, L. Birolo, S. Pascarella, M. V. Cubellis, F. Bossa, G. Sannia, G. Marino, *Protein Eng.* **1997**, *10*, 237–248.
- [88] T. Collins, M. A. Meuwis, C. Gerday, G. Feller, *J. Mol. Biol.* **2003**, *328*, 419–428.
- [89] S. Kanaya, M. Itaya, *J. Biol. Chem.* **1992**, *267*, 10184–10192.
- [90] S. Griffin, C. L. Higgins, T. Soulimane, P. Wittung-Stafshede, *Eur. J. Biochem.* **2003**, *270*, 4736–4743.
- [91] H. Nojima, T. Oshima, H. Noda, *J. Biol. Chem.* **1979**, *85*, 1509–1517.
- [92] M. González, C. E. Argaraña, G. D. Fidelio, *Biomol. Eng.* **1999**, *16*, 67–72.
- [93] G. Feller, *J. Phys. Condens. Matter* **2010**, *22*, 1–17.
